# Supplementary material for: Durable multimodal and holistic response for physiologic closed-loop spinal cord stimulation supported by objective evidence from the EVOKE double-blind randomized controlled trial
Source: PubMed Central journal article supplement — Reg Anesth Pain Med. 2023 Jul 25;49(4):233–40. doi: 10.1136/rapm-2023-104639 (PMC11041592; doi:10.1136/rapm-2023-104639), 2023-07-25
Supplement: rapm-2023-104639supp001.pdf [file rapm-2023-104639supp001.pdf]

## Supplementary material 1

### Percent whole

Percent whole provides an estimate of patient proximity to attainment of holistic treatment response (e.g., response of at least 1 MCID for all impaired domains equals 100% whole; response of at least 1 MCID for three out of four impaired domains equals 75% whole).

Percent whole was significantly greater at 12-months (mean difference [MD] 15, 95% confidence interval [95% CI]: 2.5-27.5,  $p=0.019$ ) and 24-months (MD 13.7, 95% CI: 1.5-25.8,  $p=0.028$ ) follow-up.

|                                   |                              |             |                             |             |                             |             |
|-----------------------------------|------------------------------|-------------|-----------------------------|-------------|-----------------------------|-------------|
| <b>Percent whole, mean (SD)</b>   | 76.6 (32.2)                  | 66.5 (36.4) | 75.4 (33.8)                 | 60.4 (39.1) | 71.6 (34.2)                 | 57.9 (36.9) |
| <b>Mean difference and 95% CI</b> | 10.1 (-1.7, 21.8), $P=0.092$ |             | 15.0 (2.5, 27.5), $P=0.019$ |             | 13.7 (1.5, 25.8), $P=0.028$ |             |

CI=confidence interval; SD=standard deviation

## SUPPLEMENTARY MATERIAL 2

**Table S1. Proportion of responders and cumulative MCIDs at 3-, 12- and 24-months from those patients with impairment in all domains at baseline**

|                                                                            | 3-month                    |               | 12-month                   |               | 24-month                   |               |
|----------------------------------------------------------------------------|----------------------------|---------------|----------------------------|---------------|----------------------------|---------------|
|                                                                            | Closed-loop SCS            | Open-loop SCS | Closed-loop SCS            | Open-loop SCS | Closed-loop SCS            | Open-loop SCS |
| <b>Pain intensity responders (VAS Overall <math>\geq 30\%</math>)</b>      | 41/44 (93.2%)              | 25/36 (69.4%) | 41/44 (93.2%)              | 25/36 (69.4%) | 38/44 (86.4%)              | 22/36 (61.1%) |
| Risk difference (%) and 95% CI, P-value                                    | 23.7 (6.9, 40.5), P=0.006  |               | 23.7 (6.9, 40.5), P=0.006  |               | 25.3 (6.4, 44.1), P=0.009  |               |
| Mean (SD) number of MCIDs                                                  | 2.5 (0.9)                  | 1.9 (1.2)     | 2.6 (0.8)                  | 1.8 (1.2)     | 2.4 (1.0)                  | 1.7 (1.2)     |
| Mean difference and 95%CI, P-value                                         | 0.6 (0.2, 1.1), P=0.006    |               | 0.7 (0.3, 1.2), P=0.003    |               | 0.7 (0.2, 1.1), P=0.009    |               |
| <b>Physical function responders (ODI Score <math>\geq 10</math>)</b>       | 36/44 (81.8%)              | 22/36 (61.1%) | 32/44 (72.7%)              | 21/36 (58.3%) | 34/44 (77.3%)              | 22/36 (61.1%) |
| Risk difference (%) and 95% CI, P-value                                    | 20.7 (1.1, 40.3), P=0.047  |               | 14.4 (-6.4, 35.2), P=0.236 |               | 16.2 (-4.0, 36.3), P=0.145 |               |
| Mean (SD) number of MCIDs                                                  | 2.7 (1.9)                  | 1.8 (1.8)     | 2.7 (1.8)                  | 1.6 (1.7)     | 2.3 (1.6)                  | 1.5 (1.5)     |
| Mean difference and 95%CI, P-value                                         | 1.0 (0.2, 1.8), P=0.021    |               | 1.1 (0.3, 1.9), P=0.007    |               | 0.8 (0.1, 1.5), P=0.022    |               |
| <b>QoL responders (EQ-5D-5L Index Score <math>\geq 0.074</math>)</b>       | 36/44 (81.8%)              | 22/36 (61.1%) | 35/44 (79.5%)              | 20/36 (55.6%) | 34/44 (77.3%)              | 21/36 (58.3%) |
| Risk difference (%) and 95% CI, P-value                                    | 20.7 (1.1, 40.3), P=0.047  |               | 24.0 (3.9, 44.1), P=0.029  |               | 18.9 (-1.4, 39.3), P=0.091 |               |
| Mean (SD) number of MCIDs                                                  | 3.5 (2.7)                  | 2.4 (2.4)     | 3.2 (3.0)                  | 2.0 (2.3)     | 3.2 (2.4)                  | 1.9 (2.0)     |
| Mean difference and 95%CI, P-value                                         | 1.1 (-0.1, 2.2), P=0.065   |               | 1.2 (0.0, 2.4), P=0.048    |               | 1.3 (0.3, 2.3), P=0.011    |               |
| <b>Sleep responders (PSQI <math>\geq 3</math>)</b>                         | 30/44 (68.2%)              | 16/36 (44.4%) | 33/44 (75.0%)              | 15/36 (41.7%) | 27/44 (61.4%)              | 13/36 (36.1%) |
| Risk difference (%) and 95% CI, P-value                                    | 23.7 (2.5, 45.0), P=0.042  |               | 33.3 (12.8, 53.9), P=0.003 |               | 25.3 (4.0, 46.5), P=0.042  |               |
| Mean (SD) number of MCIDs                                                  | 1.8 (1.7)                  | 1.1 (1.6)     | 2.0 (1.5)                  | 1.2 (1.8)     | 1.6 (1.6)                  | 0.9 (1.6)     |
| Mean difference and 95%CI, P-value                                         | 0.7 (-0.1, 1.4), P=0.079   |               | 0.8 (0.1, 1.6), P=0.025    |               | 0.7 (-0.1, 1.4), P=0.069   |               |
| <b>Emotional function responders (POMS TMD Score <math>\geq 10</math>)</b> | 31/44 (70.5%)              | 19/36 (52.8%) | 33/44 (75.0%)              | 14/36 (38.9%) | 33/44 (75.0%)              | 16/36 (44.4%) |
| Risk difference (%) and 95% CI, P-value                                    | 17.7 (-3.5, 38.8), P=0.113 |               | 36.1 (15.7, 56.5), P=0.001 |               | 30.6 (9.9, 51.2), P=0.006  |               |
| Mean (SD) number of MCIDs                                                  | 2.3 (2.2)                  | 1.2 (1.6)     | 2.5 (2.1)                  | 0.8 (1.7)     | 2.3 (2.0)                  | 0.9 (1.7)     |
| Mean difference and 95%CI, P-value                                         | 1.1 (0.2, 2.0), P=0.011    |               | 1.7 (0.8, 2.5), P<0.001    |               | 1.4 (0.5, 2.2), P=0.002    |               |

CI=confidence interval; MCID=minimal clinical important difference; ODI=Oswestry Disability Index; POMS=Profile of Mood States; PSQI=Pittsburgh Sleep Quality Index; QoL=quality of life; SCS=spinal cord stimulation; SD=standard deviation; TMD=total mood disorder; VAS=visual analogue scale

**Table S2. Multimodal and holistic treatment response in patients with impairment in all domains at baseline**

|                                                                                                                                                                                                                   | 3-month                    |               | 12-month                   |               | 24-month                   |               |
|-------------------------------------------------------------------------------------------------------------------------------------------------------------------------------------------------------------------|----------------------------|---------------|----------------------------|---------------|----------------------------|---------------|
|                                                                                                                                                                                                                   | Closed-loop SCS            | Open-loop SCS | Closed-loop SCS            | Open-loop SCS | Closed-loop SCS            | Open-loop SCS |
| <b>Multimodal treatment responders (MCID in at least 2 impaired domains out of VAS<math>\geq</math>30%, ODI<math>\geq</math>10, EQ-5D<math>\geq</math>0.074, PSQI<math>\geq</math>3, POMS<math>\geq</math>10)</b> |                            |               |                            |               |                            |               |
| Responders in $\geq$ 1 impaired domain                                                                                                                                                                            | 43/44 (97.7%)              | 29/36 (80.6%) | 43/44 (97.7%)              | 28/36 (77.8%) | 43/44 (97.7%)              | 28/36 (77.8%) |
| Responders in $\geq$ 2 impaired domains                                                                                                                                                                           | 38/44 (86.4%)              | 25/36 (69.4%) | 37/44 (84.1%)              | 22/36 (61.1%) | 37/44 (84.1%)              | 23/36 (63.9%) |
| Responders in $\geq$ 3 impaired domains                                                                                                                                                                           | 37/44 (84.1%)              | 23/36 (63.9%) | 34/44 (77.3%)              | 20/36 (55.6%) | 34/44 (77.3%)              | 21/36 (58.3%) |
| Responders in $\geq$ 4 impaired domains                                                                                                                                                                           | 31/44 (70.5%)              | 18/36 (50.0%) | 32/44 (72.7%)              | 15/36 (41.7%) | 29/44 (65.9%)              | 16/36 (44.4%) |
| Responders in 5 impaired domains                                                                                                                                                                                  | 25/44 (56.8%)              | 9/36 (25.0%)  | 28/44 (63.6%)              | 10/36 (27.8%) | 23/44 (52.3%)              | 6/36 (16.7%)  |
| Cumulative responder score, mean (SD)                                                                                                                                                                             | 12.9 (7.7)                 | 8.4 (7.3)     | 13.1 (7.6)                 | 7.5 (7.6)     | 11.7 (6.6)                 | 6.9 (6.5)     |
| Mean difference (95%CI)                                                                                                                                                                                           | 4.5 (1.1, 7.8), P=0.010    |               | 5.6 (2.2, 8.9), P=0.002    |               | 4.8 (1.9, 7.8), P=0.002    |               |
| Percent whole, mean (SD)                                                                                                                                                                                          | 79.1 (29.9)                | 57.8 (37.9)   | 79.1 (32.3)                | 52.8 (39.8)   | 75.5 (31.7)                | 52.2 (37.4)   |
| Mean difference (95%CI)                                                                                                                                                                                           | 21.3 (6.2, 36.4), P=0.006  |               | 26.3 (10.3, 42.3), P=0.002 |               | 23.2 (7.9, 38.6), P=0.004  |               |
| Holistic treatment responder                                                                                                                                                                                      | 25/44 (56.8%)              | 9/36 (25.0%)  | 28/44 (63.6%)              | 10/36 (27.8%) | 23/44 (52.3%)              | 6/36 (16.7%)  |
| Risk difference (%) and 95% CI                                                                                                                                                                                    | 31.8 (11.5, 52.2), P=0.006 |               | 35.9 (15.5, 56.3), P=0.002 |               | 35.6 (16.5, 54.7), P=0.001 |               |

MCID=minimal clinical important difference; ODI=Oswestry Disability Index; POMS=Profile of Mood States; PSQI=Pittsburgh Sleep Quality Index; SCS=spinal cord stimulation; SD=standard deviation; VAS=visual analogue scale

**Table S3. Proportion of responders and cumulative MCIDs at 3-, 12- and 24-months for all patients regardless of baseline impairment**

|                                                                       | 3-month                    |               | 12-month                   |               | 24-month                   |               |
|-----------------------------------------------------------------------|----------------------------|---------------|----------------------------|---------------|----------------------------|---------------|
|                                                                       | Closed-loop SCS            | Open-loop SCS | Closed-loop SCS            | Open-loop SCS | Closed-loop SCS            | Open-loop SCS |
| <b>Pain intensity responders (VAS Overall <math>\geq 30\%</math>)</b> | 60/67 (89.6%)              | 51/67 (76.1%) | 61/67 (91.0%)              | 50/67 (74.6%) | 54/67 (80.6%)              | 46/67 (68.7%) |
| Risk difference (%) and 95% CI, P-value                               | 13.4 (0.9, 26.0), P=0.036  |               | 16.4 (4.0, 28.9), P=0.010  |               | 11.9 (-2.7, 26.5), P=0.109 |               |
| Mean (SD) number of MCIDs                                             | 2.4 (0.9)                  | 2.0 (1.1)     | 2.5 (0.8)                  | 2.0 (1.2)     | 2.3 (1.0)                  | 1.8 (1.2)     |
| Mean difference and 95%CI, P-value                                    | 0.4 (0.1, 0.8), P=0.024    |               | 0.5 (0.1, 0.8), P=0.005    |               | 0.5 (0.1, 0.9), P=0.010    |               |
| <b>Physical function (ODI Score <math>\geq 10</math>)</b>             | 53/67 (79.1%)              | 47/67 (70.1%) | 47/67 (70.1%)              | 43/67 (64.2%) | 49/67 (73.1%)              | 43/67 (64.2%) |
| Risk difference (%) and 95% CI, P-value                               | 9.0 (-5.7, 23.6), P=0.321  |               | 6.0 (-9.9, 21.8), P=0.581  |               | 9.0 (-6.7, 24.6), P=0.352  |               |
| Mean (SD) number of MCIDs                                             | 2.6 (1.8)                  | 2.1 (1.8)     | 2.4 (1.8)                  | 1.9 (1.7)     | 2.2 (1.6)                  | 1.6 (1.6)     |
| Mean difference and 95%CI, P-value                                    | 0.5 (-0.1, 1.1), P=0.092   |               | 0.5 (-0.1, 1.1), P=0.083   |               | 0.6 (0.0, 1.1), P=0.036    |               |
| <b>QoL (EQ-5D-5L Index Score <math>\geq 0.074</math>)</b>             | 52/67 (77.6%)              | 46/67 (68.7%) | 50/67 (74.6%)              | 40/67 (59.7%) | 50/67 (74.6%)              | 41/67 (61.2%) |
| Risk difference (%) and 95% CI, P-value                               | 9.0 (-6.0, 23.9), P=0.330  |               | 14.9 (-0.8, 30.6), P=0.097 |               | 13.4 (-2.2, 29.1), P=0.138 |               |
| Mean (SD) number of MCIDs                                             | 3.1 (2.5)                  | 2.7 (2.4)     | 2.9 (2.7)                  | 2.2 (2.4)     | 2.9 (2.2)                  | 2.0 (2.2)     |
| Mean difference and 95%CI, P-value                                    | 0.4 (-0.4, 1.3), P=0.330   |               | 0.6 (-0.2, 1.5), P=0.143   |               | 0.9 (0.2, 1.7), P=0.018    |               |
| <b>Sleep (PSQI Global Score <math>\geq 3</math>)</b>                  | 44/67 (65.7%)              | 35/67 (52.2%) | 45/67 (67.2%)              | 32/67 (47.8%) | 39/67 (58.2%)              | 27/67 (40.3%) |
| Risk difference (%) and 95% CI, P-value                               | 13.4 (-3.1, 29.9), P=0.160 |               | 19.4 (3.0, 35.8), P=0.036  |               | 17.9 (1.3, 34.6), P=0.057  |               |
| Mean (SD) number of MCIDs                                             | 1.6 (1.6)                  | 1.2 (1.3)     | 1.7 (1.5)                  | 1.1 (1.5)     | 1.3 (1.5)                  | 0.9 (1.4)     |
| Mean difference and 95%CI, P-value                                    | 0.4 (-0.1, 0.9), P=0.080   |               | 0.6 (0.1, 1.1), P=0.031    |               | 0.4 (-0.1, 0.9), P=0.131   |               |
| <b>Emotional function (POMS TMD Score <math>\geq 10</math>)</b>       | 40/67 (59.7%)              | 22/67 (32.8%) | 40/67 (59.7%)              | 22/67 (32.8%) | 40/67 (59.7%)              | 20/67 (29.9%) |
| Risk difference (%) and 95% CI, P-value                               | 26.9 (10.6, 43.1), P=0.003 |               | 26.9 (10.6, 43.1), P=0.003 |               | 29.9 (13.8, 45.9), P<0.001 |               |
| Mean (SD) number of MCIDs                                             | 1.7 (2.1)                  | 0.8 (1.3)     | 1.9 (2.0)                  | 0.6 (1.4)     | 1.7 (1.9)                  | 0.6 (1.4)     |
| Mean difference and 95%CI, P-value                                    | 1.0 (0.4, 1.5), P=0.002    |               | 1.2 (0.7, 1.8), P<0.001    |               | 1.1 (0.5, 1.7), P<0.001    |               |

CI=confidence interval; MCID=minimal clinical important difference; ODI=Oswestry Disability Index; POMS=Profile of Mood States; PSQI=Pittsburgh Sleep Quality Index; QoL=quality of life; SCS=spinal cord stimulation; SD=standard deviation; TMD=total mood disorder; VAS=visual analogue scale

**Table S4. Multimodal and holistic treatment response in all patients regardless of baseline impairment**

|                                       | 3-month                 |               | 12-month                |               | 24-month                |               |
|---------------------------------------|-------------------------|---------------|-------------------------|---------------|-------------------------|---------------|
|                                       | Closed-loop SCS         | Open-loop SCS | Closed-loop SCS         | Open-loop SCS | Closed-loop SCS         | Open-loop SCS |
| Responders in $\geq 1$ domain         | 63/67 (94.0%)           | 58/67 (86.6%) | 63/67 (94.0%)           | 56/67 (83.6%) | 63/67 (94.0%)           | 56/67 (83.6%) |
| Responders in $\geq 2$ domains        | 56/67 (83.6%)           | 51/67 (76.1%) | 55/67 (82.1%)           | 45/67 (67.2%) | 53/67 (79.1%)           | 45/67 (67.2%) |
| Responders in $\geq 3$ domains        | 54/67 (80.6%)           | 46/67 (68.7%) | 49/67 (73.1%)           | 39/67 (58.2%) | 47/67 (70.1%)           | 39/67 (58.2%) |
| Responders in $\geq 4$ domains        | 45/67 (67.2%)           | 35/67 (52.2%) | 43/67 (64.2%)           | 30/67 (44.8%) | 40/67 (59.7%)           | 28/67 (41.8%) |
| Responders in 5 domains               | 31/67 (46.3%)           | 11/67 (16.4%) | 33/67 (49.3%)           | 17/67 (25.4%) | 29/67 (43.3%)           | 9/67 (13.4%)  |
| Cumulative responder score, mean (SD) | 11.6 (7.3)              | 8.9 (6.5)     | 11.3 (7.1)              | 7.8 (6.8)     | 10.4 (6.4)              | 6.9 (6.1)     |
| Mean difference (95%CI)               | 2.7 (0.4, 5.1), P=0.023 |               | 3.5 (1.1, 5.8), P=0.005 |               | 3.5 (1.3, 5.6), P=0.002 |               |

MCID=minimal clinical important difference; ODI=Oswestry Disability Index; POMS=Profile of Mood States; PSQI=Pittsburgh Sleep Quality Index; SCS=spinal cord stimulation; SD=standard deviation; VAS=visual analogue scale

As holistic treatment response considers baseline impairment, the holistic treatment response results in the primary analysis apply to this sensitivity analysis

## SUPPLEMENTARY MATERIAL 3

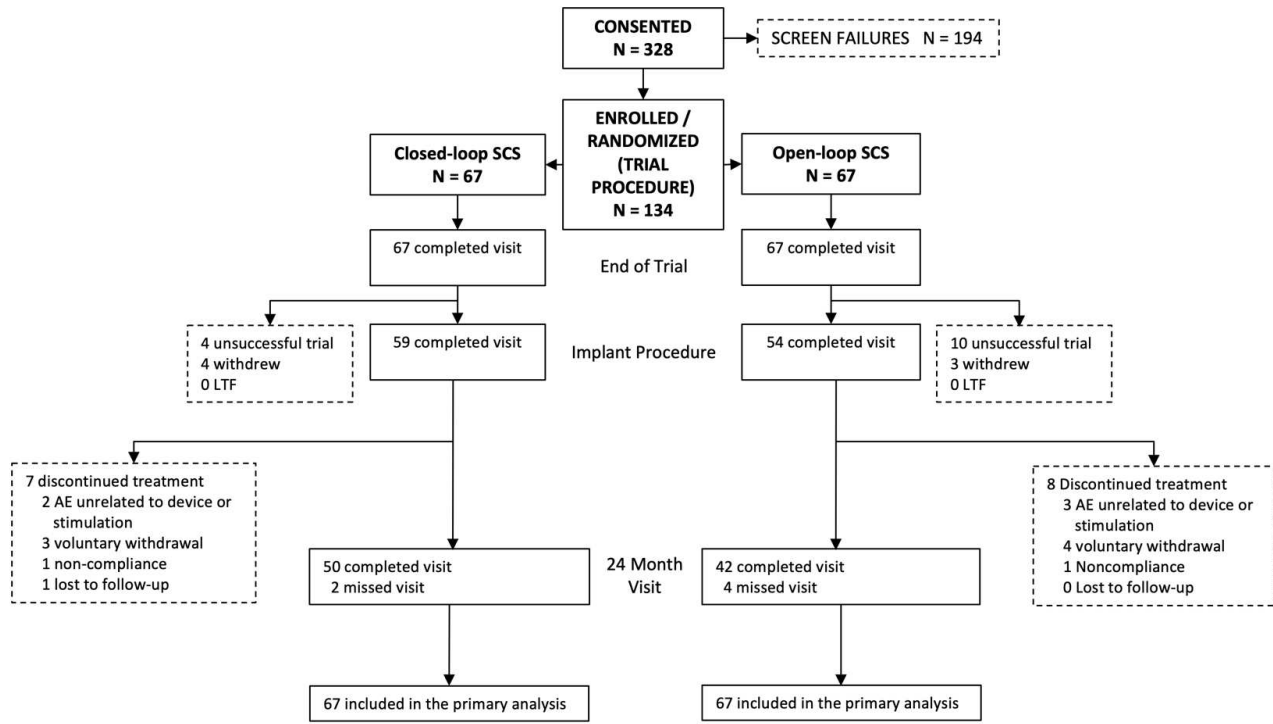

Figure S1. EVOKE study CONSORT flow diagram

**SUPPLEMENTARY MATERIAL 4**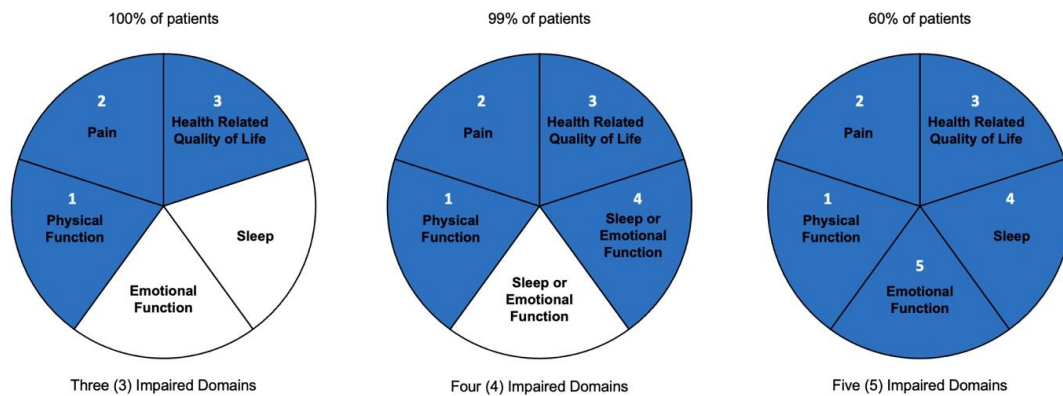

Figure S2. Proportion of combined CL-SCS and OL-SCS patients reporting impairments in the different domains at baseline – pain assessed by VAS, physical function by ODI, HRQoL by EQ-5D-5L, sleep quality by PSQI and emotional function by POMS

## SUPPLEMENTARY MATERIAL 5

**Table S5. Proportion of responders for each impaired outcome domain at 3-, 12- and 24-months**

|                                                                            | 3-month                    |               | 12-month                   |               | 24-month                   |               |
|----------------------------------------------------------------------------|----------------------------|---------------|----------------------------|---------------|----------------------------|---------------|
|                                                                            | Closed-loop SCS            | Open-loop SCS | Closed-loop SCS            | Open-loop SCS | Closed-loop SCS            | Open-loop SCS |
| <b>Pain intensity responders (VAS Overall <math>\geq 30\%</math>)</b>      | 60/67 (89.6%)              | 51/67 (76.1%) | 61/67 (91.0%)              | 50/67 (74.6%) | 54/67 (80.6%)              | 46/67 (68.7%) |
| Risk difference (%) and 95% CI                                             | 13.4 (0.9, 26.0), P=0.036  |               | 16.4 (4.0, 28.9), P=0.010  |               | 11.9 (-2.7, 26.5), P=0.109 |               |
| <b>For reference: pain intensity <math>\geq 50\%</math> reduction</b>      | 56/67 (83.6%)              | 42/67 (62.7%) | 59/67 (88.1%)              | 43/67 (64.2%) | 53/67 (79.1%)              | 36/67 (53.7%) |
| Risk difference (%) and 95% CI                                             | 20.9 (6.3, 35.5), P=0.005  |               | 23.9 (10.0, 37.7), P<0.001 |               | 25.4 (10.0, 40.8), P=0.001 |               |
| <b>For reference: pain intensity <math>\geq 80\%</math> reduction</b>      | 37/67 (55.2%)              | 28/67 (41.8%) | 37/67 (55.2%)              | 25/67 (37.3%) | 31/67 (46.3%)              | 20/67 (29.9%) |
| Risk difference (%) and 95% CI                                             | 13.4 (-3.3, 30.2), P=0.116 |               | 17.9 (1.3, 34.5), P=0.035  |               | 16.4 (0.2, 32.6), P=0.047  |               |
| <b>Physical function responders (ODI Score <math>\geq 10</math>)</b>       | 53/67 (79.1%)              | 47/67 (70.1%) | 47/67 (70.1%)              | 43/67 (64.2%) | 49/67 (73.1%)              | 43/67 (64.2%) |
| Risk difference (%) and 95% CI                                             | 9.0 (-5.7, 23.6), P=0.321  |               | 6.0 (-9.9, 21.8), P=0.581  |               | 9.0 (-6.7, 24.6), P=0.352  |               |
| <b>QoL responders (EQ-5D-5L Index Score <math>\geq 0.074</math>)</b>       | 52/67 (77.6%)              | 46/67 (68.7%) | 50/67 (74.6%)              | 40/67 (59.7%) | 50/67 (74.6%)              | 41/67 (61.2%) |
| Risk difference (%) and 95% CI                                             | 9.0 (-6.0, 23.9), P=0.330  |               | 14.9 (-0.8, 30.6), P=0.097 |               | 13.4 (-2.2, 29.1), P=0.138 |               |
| <b>Sleep responders (PSQI <math>\geq 3</math>)</b>                         | 43/66 (65.2%)              | 34/64 (53.1%) | 45/66 (68.2%)              | 32/64 (50.0%) | 38/66 (57.6%)              | 27/64 (42.2%) |
| Risk difference (%) and 95% CI                                             | 12.0 (-4.8, 28.8), P=0.212 |               | 18.2 (1.6, 34.8), P=0.049  |               | 15.4 (-1.6, 32.4), P=0.114 |               |
| <b>Emotional function responders (POMS TMD Score <math>\geq 10</math>)</b> | 31/44 (70.5%)              | 20/38 (52.6%) | 33/44 (75.0%)              | 15/38 (39.5%) | 33/44 (75.0%)              | 16/38 (42.1%) |
| Risk difference (%) and 95% CI                                             | 17.8 (-3.0, 38.6), P=0.114 |               | 35.5 (15.4, 55.7), P=0.002 |               | 32.9 (12.6, 53.1), P=0.003 |               |

The denominator for the number of patients varies according to whether the domains were impaired at baseline.

CI=confidence interval; MCID=minimal clinical important difference; ODI=Oswestry Disability Index; POMS=Profile of Mood States; PSQI=Pittsburgh Sleep Quality Index; SCS=spinal cord stimulation; SD=standard deviation; TMD=total mood disorder; VAS=visual analogue scale



## SUPPLEMENTARY MATERIAL 6

**Table S6. Cumulative MCIDs – depth of response**

|                                                                            | 3-month                  |               | 12-month                 |               | 24-month                 |               |
|----------------------------------------------------------------------------|--------------------------|---------------|--------------------------|---------------|--------------------------|---------------|
|                                                                            | Closed-loop SCS          | Open-loop SCS | Closed-loop SCS          | Open-loop SCS | Closed-loop SCS          | Open-loop SCS |
| <b>Pain intensity (VAS Overall <math>\geq 30\%</math>), mean (SD)</b>      | 2.4 (0.9)                | 2.0 (1.1)     | 2.5 (0.8)                | 2.0 (1.2)     | 2.3 (1.0)                | 1.8 (1.2)     |
| Mean difference and 95%CI                                                  | 0.4 (0.1, 0.8), P=0.024  |               | 0.5 (0.1, 0.8), P=0.005  |               | 0.5 (0.1, 0.9), P=0.010  |               |
| <b>Physical function (ODI Score <math>\geq 10</math>), mean (SD)</b>       | 2.6 (1.8)                | 2.1 (1.8)     | 2.4 (1.8)                | 1.9 (1.7)     | 2.2 (1.6)                | 1.6 (1.6)     |
| Mean difference and 95%CI                                                  | 0.5 (-0.1, 1.1), P=0.092 |               | 0.5 (-0.1, 1.1), P=0.083 |               | 0.6 (0.0, 1.1), P=0.036  |               |
| <b>QoL (EQ-5D-5L Index Score <math>\geq 0.074</math>), mean (SD)</b>       | 3.1 (2.5)                | 2.7 (2.4)     | 2.9 (2.7)                | 2.2 (2.4)     | 2.9 (2.2)                | 2.0 (2.2)     |
| Mean difference and 95%CI                                                  | 0.4 (-0.4, 1.3), P=0.330 |               | 0.6 (-0.2, 1.5), P=0.143 |               | 0.9 (0.2, 1.7), P=0.018  |               |
| <b>Sleep (PSQI Global Score <math>\geq 3</math>), mean (SD)</b>            | 1.6 (1.6)                | 1.2 (1.3)     | 1.7 (1.5)                | 1.2 (1.5)     | 1.3 (1.5)                | 1.0 (1.4)     |
| Mean difference and 95%CI                                                  | 0.4 (-0.1, 0.9), P=0.119 |               | 0.5 (0.0, 1.0), P=0.048  |               | 0.3 (-0.2, 0.9), P=0.186 |               |
| <b>Emotional function (POMS TMD Score <math>\geq 10</math>), mean (SD)</b> | 2.3 (2.2)                | 1.2 (1.5)     | 2.5 (2.1)                | 0.8 (1.6)     | 2.3 (2.0)                | 0.9 (1.7)     |
| Mean difference and 95%CI                                                  | 1.1 (0.3, 2.0), P=0.009  |               | 1.7 (0.8, 2.5), P<0.001  |               | 1.4 (0.6, 2.2), P=0.001  |               |
| <b>Cumulative responder score, mean (SD)</b>                               | 11.4 (7.2)               | 8.7 (6.5)     | 11.1 (7.2)               | 7.7 (6.6)     | 10.2 (6.4)               | 6.8 (5.9)     |
| Mean difference and 95%CI                                                  | 2.6 (0.3, 5.0), P=0.028  |               | 3.4 (1.0, 5.7), P=0.005  |               | 3.4 (1.3, 5.5), P=0.002  |               |
| <b>Holistic MCID, mean (SD)</b>                                            | 2.4 (1.5)                | 2.0 (1.4)     | 2.3 (1.4)                | 1.7 (1.4)     | 2.2 (1.3)                | 1.5 (1.3)     |
| Mean difference and 95%CI                                                  | 0.5 (0.0, 0.9), P=0.070  |               | 0.6 (0.1, 1.1), P=0.015  |               | 0.6 (0.2, 1.1), P=0.005  |               |

CI=confidence interval; MCID=minimal clinical important difference; ODI=Oswestry Disability Index; POMS=Profile of Mood States; PSQI=Pittsburgh Sleep Quality Index; SCS=spinal cord stimulation; SD=standard deviation; TMD=total mood disorder; VAS=visual analogue scale

## SUPPLEMENTARY MATERIAL 7

Table S7. Neural activation and system utilization in closed-loop and open-loop SCS

|                                                                  | 3-month             |                     | 12-month            |                     | 24-month            |                     |
|------------------------------------------------------------------|---------------------|---------------------|---------------------|---------------------|---------------------|---------------------|
|                                                                  | Closed-loop SCS     | Open-loop SCS       | Closed-loop SCS     | Open-loop SCS       | Closed-loop SCS     | Open-loop SCS       |
| <b>Neural Activation (mode ECAP elicited, <math>\mu</math>V)</b> | 32.3<br>[11.5-52.0] | 4.0<br>[1.5-10.5]   | 24.0<br>[12.5-67.5] | 4.3<br>[1.3-19.5]   | 21.3<br>[5.5-49.0]  | 4.5<br>[1.0-15.0]   |
| P-value †                                                        | <0.001              |                     | <0.001              |                     | <0.001              |                     |
| <b>Neural Activation Accuracy (RMSE, <math>\mu</math>V) ‡</b>    | 3.1<br>[1.8-4.8]    | 11.4<br>[7.2-26.1]  | 4.2<br>[2.4-5.9]    | 26.8<br>[11.2-51.7] | 3.4<br>[2.3-5.8]    | 24.3<br>[14.4-56.9] |
| P-value †                                                        | <0.001              |                     | <0.001              |                     | <0.001              |                     |
| <b>System Utilization (% time on)</b>                            | 87.7<br>[65.597.3]  | 91.7<br>[77.5-96.9] | 81.5<br>[52.4-95.7] | 83.3<br>[33.2-98.7] | 86.2<br>[35.1-96.3] | 82.4<br>[21.7-98.0] |
| P-value †                                                        | 0.321               |                     | 0.714               |                     | 0.390               |                     |

Data are medians [IQR]

† difference between medians

‡ Lower values equal greater neural activation accuracy
